# Supplementary material
Source: HighWire-hosted journal article supplement (https://jitc.bmj.com/content/11/9/e007313)
Supplement: inline-supplementary-material-1 [file inline-supplementary-material-1.xlsx]

## Sheet: Sheet1
Table S1. Clinicopathological characteristics e of in colon cancer patients from Zhongnan hospital (n=80).
Variable	No.	Percent(%)
Gender
Male	48	0.6
Female	32	0.4
Age
>60	27	0.3375
<=60	53	0.6625
T
T1	4	0.05
T2	5	0.0625
T3	32	0.4
T4	14	0.175
NA	25	0.3125
N
N0	34	0.425
N1	12	0.15
N2	8	0.1
N3	1	0.0125
NA	25	0.3125
M
M0	51	0.6375
M1	4	0.05
NA	25	0.3125
CerbB-2
Negative	46	0.575
Positive	5	0.0625
NA	29	0.3625
MMR
MSS	50	0.625
MSI	6	0.075
NA	24	0.3
